# Supplementary material for: Endothelial responses of the alveolar barrier in vitro in a dose-controlled exposure to diesel exhaust particulate matter
Source: PubMed Central journal article supplement (PMC5339948; doi:10.1186/s12989-017-0186-4), 2017-03-06

**Nrf2**

**Hoechst 33342**

**Overlay**

**EA.hy 926  
control  
cells**

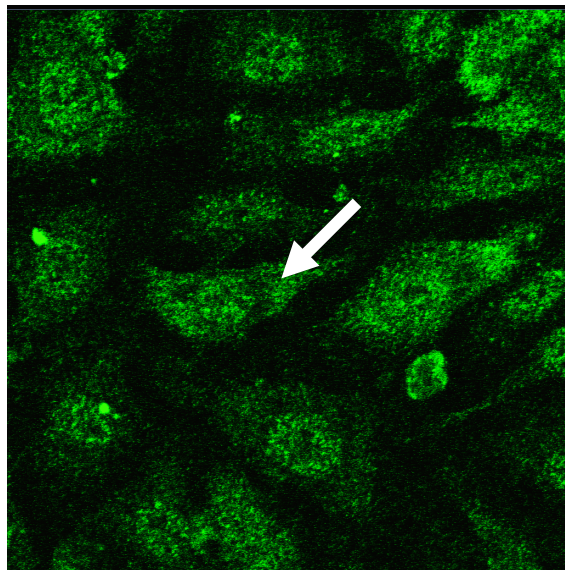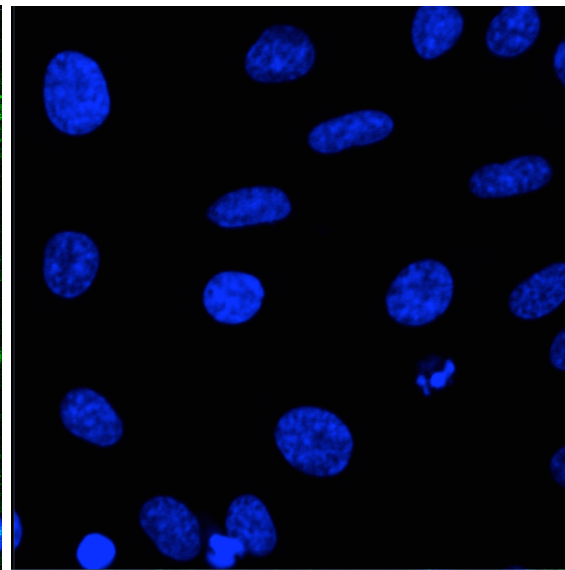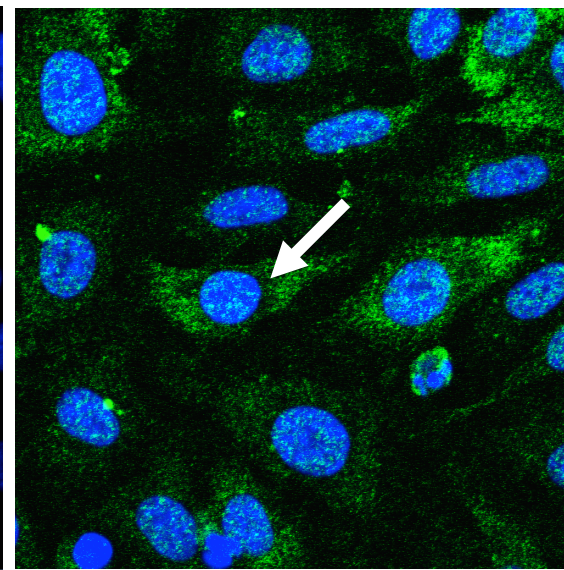

**2 h  
20 mM  
AAPH**

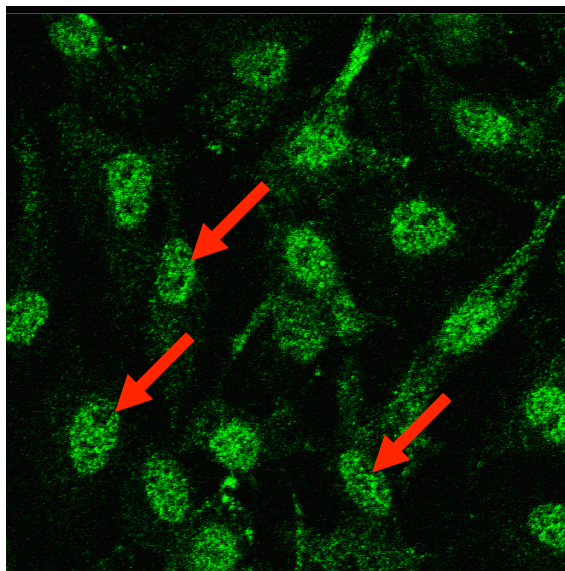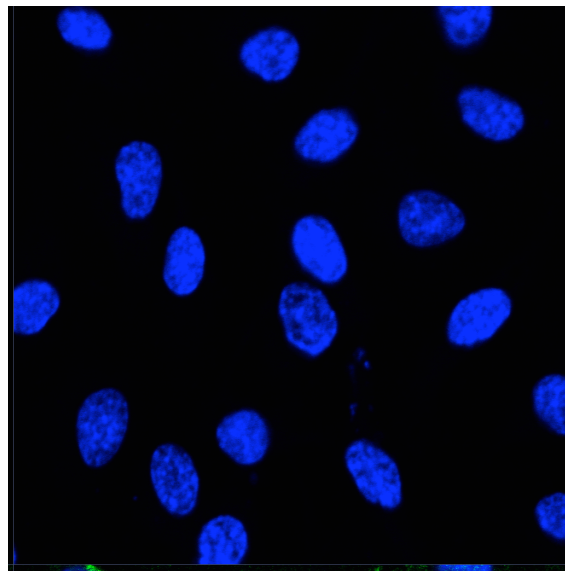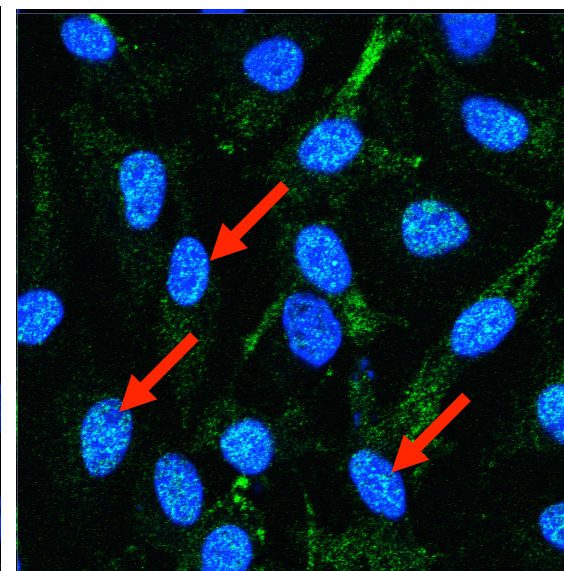

Supplement: 12989_2017_186_MOESM1_ESM.pdf [file 12989_2017_186_MOESM1_ESM.pdf]
