# Supplementary material for: Endothelial responses of the alveolar barrier in vitro in a dose-controlled exposure to diesel exhaust particulate matter
Source: PubMed Central journal article supplement (PMC5339948; doi:10.1186/s12989-017-0186-4), 2017-03-06
Supplement: 12989_2017_186_MOESM2_ESM.pdf [file 12989_2017_186_MOESM2_ESM.pdf]

|               | <i>HMOX1</i>     |                  | <i>HMOX2</i> |            | <i>SOD1</i> |             | <i>NQO1</i>      |                  | <i>HSP70</i> |             | <i>NRF2</i> |           |
|---------------|------------------|------------------|--------------|------------|-------------|-------------|------------------|------------------|--------------|-------------|-------------|-----------|
|               | 6 h              | 24 h             | 6 h          | 24 h       | 6 h         | 24 h        | 6 h              | 24 h             | 6 h          | 24 h        | 6h          | 24 h      |
| AAPH<br>4mM   | 1.4 ± 0.07       | <b>6.6 ± 0.3</b> | 0.98 ± 0.06  | 0.9 ± 0.05 | 1.2 ± 0.3   | 1.4 ± 0.04  | 1.3 ± 0.07       | 1.7 ± 0.1        | 0.8 ± 0.05   | 0.02 ± 0.02 | 1.8 ± 0.08  | 1.1 ± 0.1 |
| AAPH<br>20mM  | 1.6 ± 0.09       | <b>25.7 ± 1</b>  | 0.95 ± 0.05  | 1 ± 0.03   | 1.1 ± 0.07  | 1.2 ± 0.1   | 1.3 ± 0.1        | <b>2.2 ± 0.2</b> | 0.5 ± 0.02   | 0.1 ± 0.07  | 1.8 ± 0.2   | 1.4 ± 0.1 |
| AAPH<br>100mM | 0.8 ± 0.06       | NA               | 1.3 ± 0.1    | NA         | 1.3 ± 0.1   | NA          | 1.2 ± 0.1        | NA               | 1.5 ± 0.1    | NA          | 1 ± 0.1     | NA        |
| tBHQ<br>10 μM | 1.4 ± 0.07       | 1.7 ± 0.1        | 1 ± 0.03     | 1.3 ± 0.1  | 0.9 ± 0.04  | 1 ± 0.06    | 1.8 ± 0.1        | 1.8 ± 0.1        | 1 ± 0.05     | 1 ± 0.08    | 0.9 ± 0.06  | 1 ± 0.07  |
| tBHQ<br>40 μM | <b>2.9 ± 0.1</b> | <b>3.4 ± 0.4</b> | 1 ± 0.05     | 1.5 ± 0.2  | 0.8 ± 0.04  | 0.9 ± 0.1   | 1.8 ± 0.1        | <b>2.9 ± 0.4</b> | 1.1 ± 0.06   | 1.4 ± 0.1   | 0.7 ± 0.05  | 0.9 ± 0.1 |
| tBHQ<br>80 μM | <b>5 ± 0.3</b>   | <b>6 ± 0.5</b>   | 1.2 ± 0.05   | 1.6 ± 0.1  | 0.8 ± 0.06  | 1.25 ± 0.08 | <b>2.3 ± 0.1</b> | <b>2.8 ± 0.2</b> | 1.6 ± 0.1    | 1.6 ± 0.1   | 0.9 ± 0.1   | 1.1 ± 0.1 |
