# Supplementary material for: Endothelial responses of the alveolar barrier in vitro in a dose-controlled exposure to diesel exhaust particulate matter
Source: PubMed Central journal article supplement (PMC5339948; doi:10.1186/s12989-017-0186-4), 2017-03-06
Supplement: 12989_2017_186_MOESM3_ESM.pdf [file 12989_2017_186_MOESM3_ESM.pdf]

**A****pro-inflammatory cytokines panel**

| Cytokine |                | 80 ng/cm <sup>2</sup> |   |       |        |   |       |        |   |       | 240 ng/cm <sup>2</sup> |   |       |        |   |       |        |   |       |
|----------|----------------|-----------------------|---|-------|--------|---|-------|--------|---|-------|------------------------|---|-------|--------|---|-------|--------|---|-------|
|          |                | 6h                    |   |       | 24h    |   |       | 48h    |   |       | 6h                     |   |       | 24h    |   |       | 48h    |   |       |
|          |                |                       | ± |       |        | ± |       |        | ± |       |                        | ± |       |        | ± |       |        | ± |       |
| IFN-γ    | <i>control</i> | 7,5                   | ± | 2,6   | 8,2    | ± | 2,4   | 8,8    | ± | 3,4   | 4,2                    | ± | 0,9   | 8,1    | ± | 2,5   | 9,0    | ± | 3,9   |
|          | <i>exposed</i> | 4,9                   | ± | 2,7   | 8,5    | ± | 3,4   | 14,0   | ± | 3,7   | 2,9                    | ± | 1,1   | 5,6    | ± | 1,7   | 10,1   | ± | 3,7   |
| IL-10    | <i>control</i> | 3,9                   | ± | 1,4   | 10,0   | ± | 5,7   | 6,3    | ± | 2,9   | 2,7                    | ± | 1,0   | 7,0    | ± | 2,3   | 7,7    | ± | 4,0   |
|          | <i>exposed</i> | 4,5                   | ± | 1,3   | 5,3    | ± | 2,0   | 8,4    | ± | 2,8   | 3,2                    | ± | 0,5   | 3,9    | ± | 1,4   | 6,6    | ± | 2,6   |
| IL-12p70 | <i>control</i> | 3,2                   | ± | 0,8   | 3,5    | ± | 0,9   | 5,0    | ± | 1,1   | 1,2                    | ± | 0,1   | 3,3    | ± | 1,0   | 3,9    | ± | 1,4   |
|          | <i>exposed</i> | 1,8                   | ± | 1,0   | 3,4    | ± | 1,3   | 3,3    | ± | 1,4   | 1,1                    | ± | 0,4   | 2,7    | ± | 0,9   | 3,7    | ± | 1,2   |
| IL-13    | <i>control</i> | 48,4                  | ± | 17,4  | 75,6   | ± | 17,3  | 38,6   | ± | 14,0  | 44,4                   | ± | 9,5   | 65,3   | ± | 18,1  | 50,9   | ± | 20,8  |
|          | <i>exposed</i> | 45,2                  | ± | 9,4   | 43,6   | ± | 17,4  | 72,7   | ± | 23,4  | 43,6                   | ± | 10,7  | 35,8   | ± | 11,1  | 51,3   | ± | 17,4  |
| IL-1β    | <i>control</i> | 16,2                  | ± | 2,9   | 31,2   | ± | 7,9   | 25,3   | ± | 4,9   | 28,1                   | ± | 17,3  | 23,8   | ± | 5,7   | 16,1   | ± | 9,0   |
|          | <i>exposed</i> | 9,8                   | ± | 3,3   | 18,3   | ± | 7,1   | 16,1   | ± | 9,2   | 10,4                   | ± | 2,4   | 13,7   | ± | 2,9   | 21,2   | ± | 4,6   |
| IL-2     | <i>control</i> | 4,6                   | ± | 3,3   | 6,6    | ± | 7,9   | 5,5    | ± | 4,9   | 2,8                    | ± | 2,4   | 10,8   | ± | 5,7   | 25,5   | ± | 9,0   |
|          | <i>exposed</i> | 14,2                  | ± | 10,3  | 18,2   | ± | 13,7  | 31,2   | ± | 24,4  | 2,3                    | ± | 0,6   | 12,0   | ± | 7,7   | 6,6    | ± | 2,2   |
| IL-4     | <i>control</i> | 0,7                   | ± | 0,2   | 1,2    | ± | 0,3   | 1,5    | ± | 0,3   | 0,3                    | ± | 0,1   | 1,0    | ± | 0,4   | 1,0    | ± | 0,5   |
|          | <i>exposed</i> | 0,5                   | ± | 0,5   | 1,0    | ± | 0,4   | 0,9    | ± | 0,5   | 0,3                    | ± | 0,2   | 0,8    | ± | 0,2   | 0,9    | ± | 0,4   |
| IL-6     | <i>control</i> | 19,5                  | ± | 5,7   | 34,3   | ± | 6,3   | 29,8   | ± | 7,5   | 19,4                   | ± | 3,7   | 30,9   | ± | 10,1  | 22,7   | ± | 5,7   |
|          | <i>exposed</i> | 27,9                  | ± | 5,2   | 30,3   | ± | 4,5   | 39,6   | ± | 14,3  | 19,2                   | ± | 6,0   | 25,5   | ± | 3,4   | 29,9   | ± | 6,7   |
| IL-8     | <i>control</i> | 5815,4                | ± | 610,4 | 6183,4 | ± | 530,5 | 6236,1 | ± | 664,7 | 4718,9                 | ± | 483,6 | 6163,3 | ± | 540,2 | 5530,7 | ± | 692,7 |
|          | <i>exposed</i> | 4905,1                | ± | 753,8 | 5218,3 | ± | 681,0 | 4908,2 | ± | 672,8 | 4866,5                 | ± | 806,9 | 5092,0 | ± | 596,0 | 4905,1 | ± | 784,7 |
| TNF-α    | <i>control</i> | 4,0                   | ± | 1,7   | 3,9    | ± | 0,4   | 10,3   | ± | 2,9   | 2,9                    | ± | 0,7   | 4,6    | ± | 0,8   | 11,7   | ± | 2,8   |
|          | <i>exposed</i> | 4,0                   | ± | 1,4   | 6,2    | ± | 1,1   | 6,1    | ± | 0,9   | 3,1                    | ± | 1,3   | 6,4    | ± | 1,6   | 8,0    | ± | 1,7   |

**B****Cytokines panel**

| Cytokine |                | 80 ng/cm <sup>2</sup>                        |   |      |       |   |      |       |   |      | 240 ng/cm <sup>2</sup>                       |   |      |       |   |      |       |   |      |
|----------|----------------|----------------------------------------------|---|------|-------|---|------|-------|---|------|----------------------------------------------|---|------|-------|---|------|-------|---|------|
|          |                | 6h                                           |   |      | 24h   |   |      | 48h   |   |      | 6h                                           |   |      | 24h   |   |      | 48h   |   |      |
|          |                |                                              | ± |      |       | ± |      |       | ± |      |                                              | ± |      |       | ± |      |       | ± |      |
| GM-CSF   | <i>control</i> | 10,9                                         | ± | 2,7  | 23,7  | ± | 1,4  | 81,0  | ± | 12,8 | 6,8                                          | ± | 1,5  | 23,9  | ± | 2,5  | 82,4  | ± | 5,2  |
|          | <i>exposed</i> | 6,3                                          | ± | 1,5  | 24,6  | ± | 4,0  | 78,2  | ± | 12,6 | 23,0                                         | ± | 16,6 | 23,4  | ± | 2,5  | 83,7  | ± | 10,4 |
| IL-12p40 | <i>control</i> | 1,3                                          | ± | 0,8  | 2,3   | ± | 0,7  | 3,6   | ± | 1,9  | 1,0                                          | ± | 0,3  | 2,0   | ± | 0,3  | 2,6   | ± | 0,8  |
|          | <i>exposed</i> | 1,2                                          | ± | 0,3  | 2,0   | ± | 1,0  | 3,0   | ± | 0,6  | 0,8                                          | ± | 0,2  | 1,1   | ± | 0,3  | 1,9   | ± | 0,5  |
| IL-15    | <i>control</i> | 1,3                                          | ± | 0,5  | 3,3   | ± | 0,4  | 7,0   | ± | 1,0  | 0,8                                          | ± | 0,1  | 3,1   | ± | 0,4  | 5,8   | ± | 1,0  |
|          | <i>exposed</i> | 0,7                                          | ± | 0,2  | 3,0   | ± | 0,8  | 5,8   | ± | 1,4  | 1,6                                          | ± | 0,8  | 2,7   | ± | 0,4  | 5,2   | ± | 1,0  |
| IL-16    | <i>control</i> | 5,5                                          | ± | 1,3  | 22,6  | ± | 4,2  | 28,4  | ± | 6,6  | 8,8                                          | ± | 3,8  | 17,3  | ± | 3,1  | 27,9  | ± | 7,8  |
|          | <i>exposed</i> | 9,2                                          | ± | 1,9  | 17,6  | ± | 5,1  | 38,2  | ± | 6,1  | 6,0                                          | ± | 1,3  | 15,5  | ± | 3,5  | 30,4  | ± | 4,3  |
| IL-17    | <i>control</i> | <b>Not detectable under assay conditions</b> |   |      |       |   |      |       |   |      | <b>Not detectable under assay conditions</b> |   |      |       |   |      |       |   |      |
|          | <i>exposed</i> | <b>Not detectable under assay conditions</b> |   |      |       |   |      |       |   |      | <b>Not detectable under assay conditions</b> |   |      |       |   |      |       |   |      |
| IL-1α    | <i>control</i> | 0,9                                          | ± | 0,2  | 7,0   | ± | 4,1  | 7,1   | ± | 2,3  | 19,9                                         | ± | 19,0 | 2,2   | ± | 0,3  | 8,5   | ± | 2,8  |
|          | <i>exposed</i> | 1,5                                          | ± | 0,2  | 2,7   | ± | 0,6  | 6,6   | ± | 2,1  | 1,0                                          | ± | 0,2  | 3,0   | ± | 0,4  | 7,4   | ± | 2,0  |
| IL-5     | <i>control</i> | <b>Not detectable under assay conditions</b> |   |      |       |   |      |       |   |      | <b>Not detectable under assay conditions</b> |   |      |       |   |      |       |   |      |
|          | <i>exposed</i> | <b>Not detectable under assay conditions</b> |   |      |       |   |      |       |   |      | <b>Not detectable under assay conditions</b> |   |      |       |   |      |       |   |      |
| IL-7     | <i>control</i> | 0,3                                          | ± | 0,1  | 1,4   | ± | 0,2  | 2,0   | ± | 0,4  | 0,6                                          | ± | 0,3  | 1,3   | ± | 0,2  | 2,3   | ± | 0,7  |
|          | <i>exposed</i> | 0,6                                          | ± | 0,2  | 1,0   | ± | 0,3  | 2,7   | ± | 0,6  | 0,3                                          | ± | 0,1  | 1,0   | ± | 0,3  | 2,2   | ± | 0,5  |
| TNF-β    | <i>control</i> | 0,0                                          | ± | 0,0  | 0,0   | ± | 0,0  | 0,0   | ± | 0,0  | 0,0                                          | ± | 0,0  | 0,1   | ± | 0,0  | 0,0   | ± | 0,0  |
|          | <i>exposed</i> | 0,1                                          | ± | 0,0  | 0,1   | ± | 0,0  | 0,0   | ± | 0,0  | 0,1                                          | ± | 0,0  | 0,1   | ± | 0,0  | 0,0   | ± | 0,0  |
| VEGF     | <i>control</i> | 29,3                                         | ± | 4,5  | 125,5 | ± | 17,2 | 357,3 | ± | 38,9 | 113,4                                        | ± | 76,2 | 110,1 | ± | 21,5 | 376,0 | ± | 52,2 |
|          | <i>exposed</i> | 51,7                                         | ± | 18,2 | 114,2 | ± | 18,3 | 329,7 | ± | 55,0 | 39,1                                         | ± | 5,5  | 107,3 | ± | 12,4 | 330,2 | ± | 44,3 |

**C****Chemokines panel**

| Cytokine |                | 80 ng/cm <sup>2</sup> |   |        |        |   |        |         |   |        | 240 ng/cm <sup>2</sup> |   |        |        |   |        |        |   |        |
|----------|----------------|-----------------------|---|--------|--------|---|--------|---------|---|--------|------------------------|---|--------|--------|---|--------|--------|---|--------|
|          |                | 6h                    |   |        | 24h    |   |        | 48h     |   |        | 6h                     |   |        | 24h    |   |        | 48h    |   |        |
|          |                |                       | ± |        |        | ± |        |         | ± |        |                        | ± |        |        | ± |        |        | ± |        |
| Eotaxin  | <i>control</i> | 41,1                  | ± | 18,6   | 13,7   | ± | 5,2    | 35,5    | ± | 19,6   | 41,1                   | ± | 18,6   | 23,9   | ± | 3,9    | 35,2   | ± | 16,4   |
|          | <i>exposed</i> | 20,9                  | ± | 6,9    | 24,1   | ± | 8,2    | 30,5    | ± | 8,1    | 13,4                   | ± | 4,6    | 19,1   | ± | 5,6    | 78,3   | ± | 26,4   |
| Eotaxin3 | <i>control</i> | 6,4                   | ± | 2,6    | 9,8    | ± | 3,3    | 11,5    | ± | 4,0    | 4,6                    | ± | 0,7    | 5,8    | ± | 0,8    | 18,1   | ± | 6,0    |
|          | <i>exposed</i> | 9,5                   | ± | 3,2    | 7,0    | ± | 4,0    | 9,4     | ± | 1,3    | 9,5                    | ± | 3,2    | 7,8    | ± | 1,8    | 17,1   | ± | 4,9    |
| IP-10    | <i>control</i> | 16,4                  | ± | 6,9    | 46,9   | ± | 14,7   | 170,2   | ± | 29,1   | 16,4                   | ± | 5,4    | 44,2   | ± | 8,4    | 165,3  | ± | 16,8   |
|          | <i>exposed</i> | 16,0                  | ± | 4,0    | 57,0   | ± | 18,6   | 214,7   | ± | 76,4   | 16,0                   | ± | 4,0    | 44,0   | ± | 11,1   | 164,5  | ± | 11,7   |
| MCP-1    | <i>control</i> | 4832,0                | ± | 1181,5 | 6000,2 | ± | 1189,1 | 10545,1 | ± | 1307,9 | 4832,0                 | ± | 1181,5 | 7428,2 | ± | 1087,1 | 8985,3 | ± | 942,1  |
|          | <i>exposed</i> | 4696,7                | ± | 1186,7 | 7813,6 | ± | 492,7  | 8708,3  | ± | 1186,8 | 4314,5                 | ± | 620,7  | 6973,6 | ± | 472,9  | 8391,9 | ± | 1128,5 |
| MCP-4    | <i>control</i> | 14,5                  | ± | 6,0    | 14,0   | ± | 2,5    | 19,4    | ± | 2,9    | 12,8                   | ± | 4,4    | 20,2   | ± | 3,6    | 20,1   | ± | 3,4    |
|          | <i>exposed</i> | 12,7                  | ± | 2,7    | 11,8   | ± | 1,5    | 24,8    | ± | 5,5    | 12,7                   | ± | 2,7    | 16,8   | ± | 3,4    | 22,7   | ± | 2,3    |
| MDC      | <i>control</i> | 192,2                 | ± | 53,3   | 269,8  | ± | 64,0   | 452,2   | ± | 98,0   | 192,2                  | ± | 53,3   | 280,1  | ± | 65,1   | 461,2  | ± | 69,1   |
|          | <i>exposed</i> | 218,6                 | ± | 97,3   | 284,2  | ± | 76,9   | 439,8   | ± | 108,4  | 185,8                  | ± | 61,6   | 270,1  | ± | 59,6   | 415,2  | ± | 50,1   |
| MIP1a    | <i>control</i> | 201,6                 | ± | 134,2  | 83,3   | ± | 29,8   | 56,5    | ± | 18,7   | 134,9                  | ± | 66,3   | 115,8  | ± | 47,0   | 61,6   | ± | 18,2   |
|          | <i>exposed</i> | 260,7                 | ± | 154,1  | 103,3  | ± | 44,7   | 62,6    | ± | 21,9   | 260,7                  | ± | 154,1  | 130,6  | ± | 62,1   | 45,1   | ± | 7,6    |
| MIP1b    | <i>control</i> | 158,4                 | ± | 42,5   | 129,4  | ± | 17,5   | 87,6    | ± | 35,4   | 158,4                  | ± | 42,5   | 129,6  | ± | 19,5   | 117,9  | ± | 17,1   |
|          | <i>exposed</i> | 184,3                 | ± | 63,3   | 142,8  | ± | 29,6   | 82,4    | ± | 18,7   | 118,7                  | ± | 39,2   | 216,3  | ± | 35,5   | 75,7   | ± | 23,4   |
| TARC     | <i>control</i> | 70,2                  | ± | 46,3   | 147,1  | ± | 48,0   | 82,2    | ± | 32,1   | 51,2                   | ± | 24,5   | 116,5  | ± | 48,9   | 80,6   | ± | 50,5   |
|          | <i>exposed</i> | 62,9                  | ± | 29,6   | 108,2  | ± | 71,6   | 102,2   | ± | 46,9   | 62,9                   | ± | 29,6   | 49,1   | ± | 17,4   | 86,7   | ± | 32,4   |
